# Supplementary material for: Bortezomib enhances expression of effector molecules in anti-tumor CD8+ T lymphocytes by promoting Notch-nuclear factor-κB crosstalk
Source: PubMed Central journal article supplement (PMC4741704; doi:10.18632/oncotarget.5857), 2015-09-28
Supplement: oncotarget-06-32439-s001.pdf [file oncotarget-06-32439-s001.pdf]

# Bortezomib enhances expression of effector molecules in anti-tumor CD8<sup>+</sup> T lymphocytes by promoting Notch-nuclear factor- $\kappa$ B crosstalk

## Supplementary Material

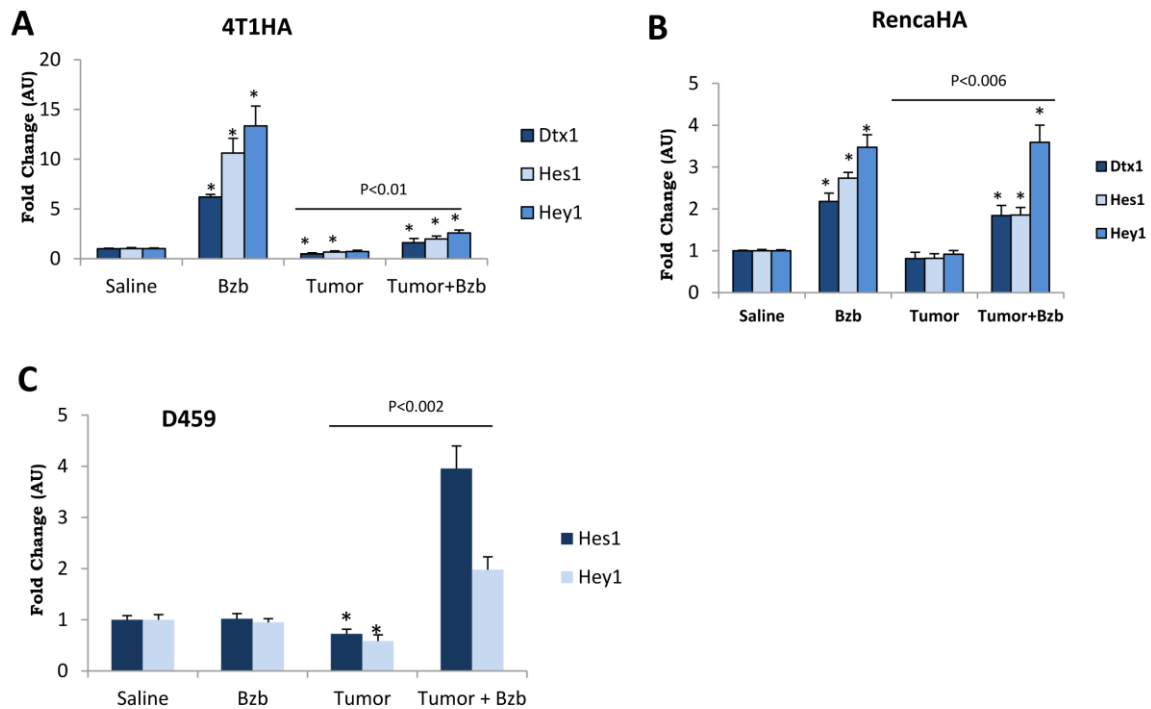

**Supplementary Figure 1. Effect of bortezomib on Notch genes in the thymus of tumor-bearing mice**

Thymocytes were harvested 4 h after bortezomib (1 mg/kg body weight, i.v.) treatment in Balb/c mice established with 14-day subcutaneous tumors of 4T1HA, RencaHA and D459. Expression of mRNA is shown for Notch target genes *Hes1*, *Hey1* and *Deltex1* in thymocytes of 4T1HA (A), RencaHA (B), and D459 (C) tumor-bearing mice. Data are expressed as mean  $\pm$  S.E.M; n = 12 mice, each group; three individual experiments; \*p<0.05 (ANOVA, one-way). All treated groups were compared to the saline administered mice.

**Supplementary Table 1.** Gene-specific PCR primers.

| <b>Target</b>         | <b>Forward primer 5'-3'</b>    | <b>Reverse primer 5'-3'</b>   |
|-----------------------|--------------------------------|-------------------------------|
| Notch1                | ACC CAC TCT GTC TCC CAC AC     | GCT TCC TTG CTA CCA CAA GC    |
| Notch2                | TCG ATG ACT GTG CCT ATG CT     | AAA TGT ACT GCC CGT TCA GG    |
| Notch3                | GTG TCA ATG GTG GTG TCT GC     | CTC ACA CAA AGT GCC CTC AA    |
| Notch4                | CTG ACC CCT CAC TTC TCC TG     | ACT GGA TCT GGG GGT ATG TG    |
| Hes1                  | GCC AAT TTG CCT TTC TCA TC     | AGC CAC TGG AAG GTG ACA CT    |
| Hey1                  | CTC TCA GCC TTC CCC TTT TC     | ATC TCT GTC CCC CAA GGT CT    |
| Deltex1               | TCC GCA TCG TCT ATG ACA TC     | AAC CAA ACT CCG TCT TGT GG    |
| Jag1                  | GGG AAC CCT GTC AAG GAA AT     | GGA CGC CTC TGA ACT CTG AC    |
| Jag2                  | CGT GGC TGC TAT CAC TCA GA     | AGC CAC AGC ACA CTG AAC AC    |
| DLL1                  | CCG GCT GAA GCT ACA GAA AC     | AGC CCC AAT GAT GCT AAC AG    |
| DLL4                  | GCA GCT GTA AGG ACC AGG AG     | ATT CGC AGG CAT AAC TGG AC    |
| Perforin              | TCT TGG TGG GAC TTC AGC TTT    | TGC TTG CAT TCT GAC CGA GT    |
| Granzyme              | ACA AAG GCA GGG GAG ATC AT     | CGA ATA AGG AAG CCC CCA CA    |
| Eomes                 | GAA CTC AGA GCT AAG TCC TCT TC | CTT CCT TCC TTC CTT CCT TCT T |
| Murine $\beta$ -actin | AGT GTG ACG TTG ACA TCC GTA    | GCC AGA GCA GTA ATC TCC TTC   |
